# Supplementary material for: Genome-Wide Identification and Bioinformatics Analyses of Host Defense Peptides Snakin/GASA in Mangrove Plants
Source: MDPI journal article supplement (doi:10.3390/genes14040923), 2023-04-16
Supplement: s1 [file s1]

## Supplementary Material

# Genome-wide identification and bioinformatics analyses of host defense peptides Snakin/GASA in mangrove plants

Chenjing Shang <sup>1,\*</sup>, TingYe <sup>1</sup>, Qiao Zhou <sup>1</sup>, Pengyu Chen <sup>1,2</sup>, Xiangyu Li <sup>1,2</sup>, Wenyi Li <sup>3</sup>, Si Chen <sup>1</sup>, Zhangli Hu <sup>1</sup>, Wei Zhang <sup>1,\*</sup>

\*Correspondence:

cjshang@szu.edu.cn, Tel.: +86 755 26958849 (C.S.);

zhangwei1994@szu.edu.cn, Tel.: +86 755 26958849 (W.Z.)

### 1. Supplementary Figures and Tables

#### 1.1. Supplementary Figures

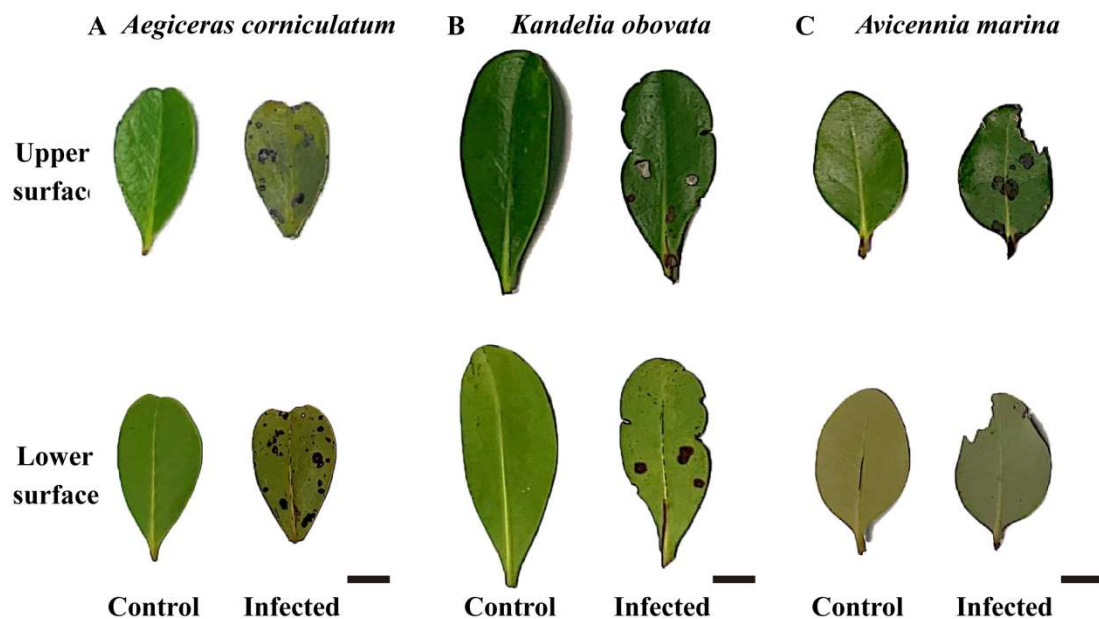

**Figure S1:** Normal leaves and leaves infected with pathogenic microorganisms of *A. corniculatum*, *K. obovata* and *A. marina*. The scales are 1 cm.

## 1.2. Supplementary Tables

**Table S1:** Primers used for qRT-PCR.

| Gene            | Primer -F (5'-3')        | Primer -R (5'-3')       |
|-----------------|--------------------------|-------------------------|
| <i>KoGASA1</i>  | TGGAACCTGCTATGGCTCAAC    | AGAGGGAACACACTTGCCT     |
| <i>KoGASA2</i>  | AGATGCACCACAAGATGCTC     | GCTTGTTCCTGCTAGGTTCCAG  |
| <i>KoGASA3</i>  | CTTTGTGGGGAGAGGTGCAA     | CATAAGTCCCTGGTGGCACA    |
| <i>KoGASA4</i>  | AGCTCCATCGCTCAGATTGC     | GCATTTGGAGCAGCACTTCA    |
| <i>KoGASA5</i>  | CAAGGCAGGTTACCAGGACC     | ATAGCACGGGCATTCTGACTT   |
| <i>KoGASA6</i>  | CCCAATGCCATCACAATGC      | GCACACGGCCTTATCCCAT     |
| <i>KoGASA7</i>  | TTGTCTTCCAGGCCAAACCTT    | AGCAGGGGCAGACATCGTA     |
| <i>KoGASA8</i>  | GCGGGGTAGGTGCTCAAAA      | AAGGGCACTCGTCCTTGTTA    |
| <i>KoGASA9</i>  | AATGGGATTGTGTTTCATCCGGT  | CTCATTTGCTTGCTCCACC     |
| <i>AcGASA1</i>  | GAGCTCTTGTGTTTGAGCCC     | ATTTGAGGCACCGGTCTTGT    |
| <i>AcGASA2</i>  | AGATGCTCAAAGGCAGCGAG     | TTCGAGGTGCAATTAACGCTG   |
| <i>AcGASA3</i>  | AAGAACCAAGCACCACTCA      | CCCGAGCTGAGCTAAAACCT    |
| <i>AcGASA4</i>  | AAAGGAACATGAAGATTGAGAACG | GTGGTGCTTGGTTCCTGCT     |
| <i>AcGASA5</i>  | GCGAGAGATGCTCGGAGG       | CAAGGGCACTCGTCCTTGTT    |
| <i>AcGASA6</i>  | ATCAACCGAGTCAGTCTTCACAA  | CACACTCCTGCCTTTCGTCC    |
| <i>AcGASA7</i>  | TGAGCTCTGGTTTGTTGAGC     | TATAAATGCCATTGAGGCACCG  |
| <i>AcGASA8</i>  | GAGCTCTGGTTTGTTGAGCC     | ATAAATGCCATTGAGGCACCG   |
| <i>AcGASA9</i>  | AAATGTTTGTTGTTGCCACCT    | CCTCCTCTTTTGGTCTTCCAGTT |
| <i>AcGASA10</i> | ATGGCCTATAAGCCCATGCC     | ATCCCGCAATATTCCAAGCATC  |
| <i>AcGASA11</i> | CACCACCAACTCCAGTGACC     | CAAAGGGGAACGCAATCGAA    |
| <i>AcGASA12</i> | TTCATCTCTCATCCAGGCGAC    | GCAGCATATCCCGCAATACTTC  |
| <i>AcGASA13</i> | GGGTAAAAGCCAGGTGCAAGA    | CTTCTTGTTCTCATAGCAAGGGC |
| <i>AmGASA1</i>  | GACACAGGCATTGCGGCTT      | GCATGGCTTCTTGATGCTGT    |
| <i>AmGASA2</i>  | ATCTTGACAGACGCTATGCCT    | CAGCAGTACTTGACGCAACG    |
| <i>AmGASA3</i>  | CCTGTCCATGCTCCAAAGGG     | TAAATGCACACATTGCCCCAC   |
| <i>AmGASA4</i>  | CCTTCTCCACCAGTTAAGGCAT   | CTCACGGCGCATAGTGGAG     |
| <i>AmGASA5</i>  | CTTCACTGGTTCACACCACAC    | ACATTCTCACAGCAGATTCCA   |
| <i>AmGASA6</i>  | AGCCTTCAACCTCAGGAGTG     | TTGTTCCCATACGTGCCTGG    |
| <i>AmGASA7</i>  | GCCACGTCAGAACTGCATAC     | CTGCACAGATTGCGCTTCTT    |
| <i>AmGASA10</i> | CAGCAACGATGGTGAAAGGTG    | TGCTCTGAGTGTAAGCTGC     |
| <i>AmGASA12</i> | CAGCATCAAGTACCACCACA     | ACACATTTGGCCTTGGCAC     |
| <i>AmGASA13</i> | ATACCACAAGCCCTGCATGTT    | AGTTGTTGTAGCAAGGGCAAAC  |
| <i>AmGASA15</i> | CGAAGACCGTTTACCTCCTCA    | CTTTGAGCATCGGCGCTTG     |
| <i>AmGASA18</i> | TCGAAGGCCACGATCAAGAG     | TCTTCTGTCTCGACGCCAAT    |
| <i>AmGASA21</i> | CTCAAAGTGCGCTGTTCCGG     | AAGGGCACTCGTCCTTGTTG    |
| <i>AmGASA23</i> | GCTGTCCCTGTCCCAACTC      | AAGCAACGATCCCACTTCC     |
| <i>AmGASA25</i> | CATCATGGCAAACCGCCAG      | GCGTAGGCCGAGTCTCT       |

**Table S2:** Reference genes were used in qRT-PCR.

| Internal reference                          | Primer -F (5'-3')      | Primer -R (5'-3')      |
|---------------------------------------------|------------------------|------------------------|
| $\beta$ -Actin of<br><i>A. corniculatum</i> | AGCTCATCGGTGGAGAAGAA   | GTTGGAACAGGACCTCAGGA   |
| 18SrRNA of<br><i>A. corniculatum</i>        | ACCATAAACGATGCCGACCAG  | TTCAGCCTTGCGACCATACTC  |
| $\beta$ -Actin of<br><i>A. marina</i>       | AGATGGCAGAAGCTGAGGA    | CCATGCCAACCATCACACC    |
| 18SrRNA of<br><i>A. marina</i>              | ACCATAAACGATGCCGACCAG  | CCTTTAAGTTTCAGCCTTGCG  |
| GAPDH of<br><i>K. obovata</i>               | TCGTCCAGGTCTCCAAG      | AGCCAGATCCACCACTC      |
| 18SrRNA of<br><i>K. obovata</i>             | CCTGAGAAACGGCTACCACATC | ACCCATCCCAAGGTCCAACTAC |

**Table S3:** Subcellular localization prediction of Snakin/GASA family members in *A. marina*, *K. obovata* and *A. corniculatum*.

| Proteins | WoLF PSORT    | Plant-PLoc      |
|----------|---------------|-----------------|
| AcGASA1  | Chloroplast   | Extracellular   |
| AcGASA2  | Extracellular | Extracellular   |
| AcGASA3  | Chloroplast   | Chloroplast     |
| AcGASA4  | Chloroplast   | Chloroplast     |
| AcGASA5  | Extracellular | Extracellular   |
| AcGASA6  | Nucleus       | Nucleus         |
| AcGASA7  | Cytoskeleton  | Chloroplast     |
| AcGASA8  | Chloroplast   | Chloroplast     |
| AcGASA9  | Chloroplast   | None            |
| AcGASA10 | Extracellular | Extracellular   |
| AcGASA11 | Extracellular | Chloroplast     |
| AcGASA12 | Extracellular | Extracellular   |
| AcGASA13 | Chloroplast   | Extracellular   |
| KoGASA1  | Extracellular | Golgi apparatus |
| KoGASA2  | Extracellular | Extracellular   |
| KoGASA3  | Extracellular | Chloroplast     |
| KoGASA4  | Extracellular | Extracellular   |
| KoGASA5  | Extracellular | Extracellular   |
| KoGASA6  | Extracellular | Extracellular   |
| KoGASA7  | Extracellular | Extracellular   |
| KoGASA8  | Extracellular | Extracellular   |
| KoGASA9  | Mitochondrion | Chloroplast     |
| AmGASA1  | Extracellular | Extracellular   |
| AmGASA2  | Chloroplast   | Extracellular   |
| AmGASA3  | Chloroplast   | Cytoplasm       |
| AmGASA4  | Extracellular | Chloroplast     |

|           |               |               |
|-----------|---------------|---------------|
| AmGASA5   | Extracellular | Extracellular |
| AmGASA6   | Extracellular | Extracellular |
| AmGASA7   | Mitochondrion | Extracellular |
| AmGASA8   | Extracellular | Extracellular |
| AmGASA9   | Extracellular | Extracellular |
| AmGASA10  | Extracellular | Extracellular |
| AmGASA11  | Extracellular | Extracellular |
| AmGASA12  | Chloroplast   | Chloroplast   |
| AmGASA13  | Chloroplast   | Extracellular |
| AmGASA14  | Extracellular | Extracellular |
| AmGASA15  | Extracellular | Extracellular |
| AmGASA16  | Extracellular | Extracellular |
| AmGASA17  | Extracellular | Extracellular |
| AmGASA18  | Extracellular | Extracellular |
| AmGASA19  | Extracellular | Chloroplast   |
| AmGASA20  | Extracellular | Extracellular |
| AmGASA21  | Extracellular | Extracellular |
| AmGASA22  | Chloroplast   | Extracellular |
| AmGASA23  | Extracellular | Extracellular |
| AmGASA24  | Extracellular | Chloroplast   |
| AmGASA25  | Extracellular | Chloroplast   |
| AmGASA 26 | Chloroplast   | Extracellular |
| AmGASA 27 | Extracellular | Extracellular |

**Table S4:** Microbial detection of infected leaves.

| Sample species         | Infected fungal species        | Infection symptoms                        |
|------------------------|--------------------------------|-------------------------------------------|
| <i>A. corniculatum</i> | <i>Tropicoporus texanus</i>    | marginal and/or interveinal scorching [1] |
| <i>K. obovata</i>      | <i>Jattaea</i> spp.            | yellow and/or ulcerated [2]               |
| <i>A. marina</i>       | <i>Berkeleyomyces basicola</i> | Wilt and/or black root rot [3]            |

**Table S5:** Identification of pathogenic microorganism

| Species                | Sequencing results of microbial PCR assays on infected leaves                                                                                                                                                                                                                                                                                                                                                                                                                                                                                                                                                                                                                    | NCBI search result Scientific Name                                                                                                                                                                 | E value                                                                          | Per. ident                                                         |
|------------------------|----------------------------------------------------------------------------------------------------------------------------------------------------------------------------------------------------------------------------------------------------------------------------------------------------------------------------------------------------------------------------------------------------------------------------------------------------------------------------------------------------------------------------------------------------------------------------------------------------------------------------------------------------------------------------------|----------------------------------------------------------------------------------------------------------------------------------------------------------------------------------------------------|----------------------------------------------------------------------------------|--------------------------------------------------------------------|
| <i>A. corniculatum</i> | CGCTCGATTGAGTTGGCTCTTGACTTTACACACCTGTGCACCTTCGGTCTGAATTTCTTGCTTGAATTTTATTCAAGTC<br>CGCTCCCTGGAGTGGGATTAGAGTGTGCGTTGGATTTATTTCCATGGCTCACTCTGCAAGAAAATCGTCCGTTTTTTAC<br>ACCTATTTTGTATGTCTTTGAATTTAATCGATTGCTCCGTGATGGGGTGATTGTAAAAATAAATACAACCTTCAGCAACGG<br>ATCTCTTGGCTCTCCCATCGATGAAGAACGCAGCGAACTGCGATACGTAATGTGAATTGCAGAAATCAGTGAATCATCG<br>AATCTTTGAACGCATCTTGCGCCGCTCGGTTTTCCGAGGGGCACGTCTGTTGAGTGTACGTTAATCTATCACCCACCTT<br>TTGGTGAAGTGGACTTGGACTGTGCTGTCATTTATTTGACGGCTCGTCTCGAAATGCATTGTTGCCTGCAGAGTCTTGCGC<br>GGAGCGAGACTGATGAAACGGTGTGATATTTATATCTGCGCTGAAGTAGTCGGTTTTGAGCTGCTGCACGAGTTGCACTC<br>TGGGCTTATAAAATCGAGGATTTTAATTAATCCCAATTTCTTTGCGTTTGACCTCAAATCAGATGGGACT | <i>Dichostereum eburneum</i>                                                                                                                                                                       | 3.00E-65                                                                         | 94.90%                                                             |
| <i>K. obovata</i>      | CCGGGGGCCGCGCGTGGGCGAGTCTCTCGCCGTGCGCCCCATCCCGTCCGACGCGTCCCGTGCCTGCTGGCGG<br>CCAACGAACCCCGCGCGGAACGCGCCAAGGAAAACCGAAACGAAGCGTCAGCTCCCGCCGCCCCGTTTCGCGGTG<br>CGCTCGGGTGGGGGACGAGGCGTCTCTGAATGTCAAAACGACTCTCGGCAACGGATATCTCGGCTCTCGCATCGATG<br>AAGAACGTAGCGAAATGCGATACTTGGTGTGAATTGCAGAATCCCGTGAACCATCGAGTCTTTGAACGCAAGTTGCGCC<br>CGAAGCCATCAGGCCAGGGCACGTCTGCCTGGGCGTCACGCATAGCGTCGCCCCCTCTCCCTCTCCACGGAGCGGAAC<br>CGGAGGGGGCGGACATTGGCCTCCCGTGTCCCTCGGGCGCGGCCGCCAAATGCGATCCCTCGGCGACGCACGTCTG<br>CGACCAGTGGTGGTTGAAAACCTCAACTCGCGTGTGGTGTCTGTTCAACGACGTCGTCCGATCGGGCATCGAGAGCG<br>ACCCAACGGCGCGATGCGCCTTCGACCGCGACCCAGGTGAGGCGGGATCAC                                           | <i>Jattaea discreta</i><br><i>Jattaea leucospermi</i><br><i>Jattaea tumidula</i><br><i>Jattaea taediosa</i><br><i>Jattaea ribicola</i><br><i>Jattaea mookgoponga</i><br><i>Jattaea aphanospora</i> | 3.00E-29<br>3.00E-29<br>3.00E-29<br>3.00E-29<br>3.00E-29<br>3.00E-29<br>3.00E-29 | 87.27%<br>87.27%<br>87.27%<br>87.27%<br>87.27%<br>87.27%<br>87.27% |
| <i>A. marina</i>       | CCACCCGGGGCCGCGCGTGGGCGAGTCTCTCGCCGTGCGCCCCATCCCGTCCGACGCGTCCCGTGCCTGCTGCTG<br>GCGGCCAACGAACCCCGCGCGGAACGCGCCAAGGAAAACCGAAACGAAGCGTCAGCTCCCGCCGCCCCGTTTCGC<br>GGTGCCTCGGGTGGGGGACGAGGCGTCTCTGAATGTCAAAACGACTCTCGGCAACGGATATCTCGGCTCTCGCATC<br>GATGAAGAACGTAGCGAAATGCGATACTTGGTGTGAATTGCAGAATCCCGTGAACCATCGAGTCTTTGAACGCAAGTTG<br>CGCCCGAAGCCATCAGGCCAGGACGCTCTGCCTGGGCGTCACGCATAGCGTCGCCCCCTCTCCCTCTCCACGGAGCG                                                                                                                                                                                                                                                                   | <i>Berkeleyomyces basicola</i>                                                                                                                                                                     | 2.00E-36                                                                         | 88.14%                                                             |

GAACCGAGGGGGCGGACATTGGCCTCCCGTGCTCCCTCGGGCGCGGCCGGCCCAATGCGATCCCTCGGCGACGCAC  
GTCGCGACCAGTGGTGGTTGAAACTCAACTCGCGTGCTGGCTGTCGTGTTCAACGACGTCGTCGATCGGGCATCGAG  
AGCGACCCAACGGCGCGATGCGCCTTCGACCGCGACCCAGGTCAGGCGGGAT

---

## References

1. Brown, A.A.; Lawrence, D.P.; Baumgartner, K. Role of Basidiomycete Fungi in the Grapevine Trunk Disease Esca. *Plant Pathol* **2020**, *69*, 205–220.
2. Kazemzadeh-Chakusary, M.; Mohammadi, H.; Sohrabi, M. Occurrence and Pathogenicity of *Jattaea Algeriensis* (Calosphaeriales, Calosphaeriaceae) and *Biscogniauxia Mediterranea* on Forest Trees in Guilan Province (Iran). *Journal of Phytopathology* **2021**, *169*, 129–138.
3. Li, X.; He, S.; Gao, Y.; Xing, S.; Ren, H.; Yang, H.; Gao, Y.; Wang, J.; Li, N.; Duan, J. Ceratocystis and Related Genera Causing Wilt of *Cunninghamia Lanceolata* Yunnan, China. *For Pathol* **2022**, *52*, e12744.
